1

2 **Oscillating bacterial expression states generate herd immunity to viral infection**

3

4

5 **Christopher J. R. Turkington<sup>a,c</sup>, Andrey Morozov<sup>b</sup>, Martha R. J. Clokie<sup>c</sup>,**

6 **Christopher D. Bayliss<sup>a#</sup>**

7

8 Department of Genetics and Genome Biology, University of Leicester, Leicester, United

9 Kingdom<sup>a</sup>; Department of Mathematics, University of Leicester, Leicester, United

10 Kingdom<sup>b</sup>; Department of Infection, Immunity, and Inflammation, Leicester, United

11 Kingdom<sup>c</sup>

12

13 Running Head: Bacterial herd immunity against viral infection

14

15 #Address correspondence to Christopher D. Bayliss, [cdb12@le.ac.uk](mailto:cdb12@le.ac.uk)

16

17 Abstract word count = 184

18

19 Main text word count = 4527

20

21

22

23

24 **Abstract:**

25 Hypermutable loci are widespread in bacteria as mechanisms for rapid generation of  
26 phenotypic diversity, enabling individual populations to survive fluctuating, often  
27 antagonistic, selection pressures. As observed for adaptive immunity, hypermutation may  
28 facilitate survival of multiple, spatially-separated bacterial populations. We developed an  
29 ‘oscillating prey assay’ to examine bacteriophage (phage) spread through populations of  
30 *Haemophilus influenzae* whose phage receptor gene, *lic2A*, is switched ‘ON’ and ‘OFF’  
31 by mutations in a hypermutable tetranucleotide repeat tract. Phage extinction was  
32 frequently observed when the proportion of phage-resistant sub-populations exceeded  
33 34%. *In silico* modelling indicated that phage extinction was interdependent on phage  
34 loss during transfer between populations and the frequency of resistant populations. In a  
35 fixed-area oscillating prey assay, heterogeneity in phage resistance was observed to  
36 generate vast differences in phage densities across multiple bacterial populations  
37 resulting in protective quarantining of some populations from phage attack. We conclude  
38 that phase-variable hypermutable loci produce bacterial ‘herd immunity’ with resistant  
39 intermediary-populations acting as a barricade to reduce the viral load faced by phage-  
40 sensitive sub-populations. This paradigm of meta-population protection is applicable to  
41 evolution of hypermutable loci in multiple bacteria-phage and host-pathogen interactions.

42

43 **Importance**

44 Herd immunity is a survival strategy wherein populations are protected against invading  
45 pathogens by resistant individuals within the population acting as a barrier to spread of  
46 the infectious agent. Although, this concept is normally only applied to higher

47 eukaryotes, prokaryotic organisms also face invasion by infectious agents, such as  
48 bacterial viruses, bacteriophage (phage). Here we use novel experimental approaches and  
49 mathematical modelling, to show that bacteria exhibit a form of herd immunity through  
50 stochastically generated resistant variants acting as barricades to phage predation of  
51 sensitive cells. With hypermutable loci found in many prokaryotic systems, this  
52 phenomenon may be widely applicable to phage-bacteria interactions and could even  
53 impact phage-driven evolution in bacteria.

54

## 55 **Introduction**

56 Hypermutable loci as mediators of survival against constantly fluctuating  
57 selection pressures are a predictable outcome of the evolution of evolvability as stated in  
58 the Red Queen hypothesis (1, 2). Fluctuating selection pressures are regularly faced by  
59 bacteria during persistence in human hosts, where bacteria adhere to host surfaces while  
60 contending with varying nutrient concentrations, frequent exposure to immune effectors  
61 and predation by bacteriophages. These fluctuations often select for and against opposing  
62 gene expression states of single loci leading to evolution of localised hypermutable  
63 mechanisms that produce frequent switches in single-gene expression states.

64 One class of hypermutable loci facilitate survival of conflicting selective  
65 pressures by pre-emptive, frequent, and reversible ‘ON/OFF’ generation of adaptive  
66 variants, in a process known as ‘phase variation’ (PV; 2–5). A major mechanism of PV  
67 involves increases and decreases in identical, tandemly-arranged DNA repeats  
68 (microsatellites) by slipped strand mispairing during DNA replication (3, 5, 6). The  
69 obligate human respiratory commensal and pathogen *H. influenzae* contains an expansive

70 array of repeat driven phase variable loci (7–13). Several of these loci are required for  
71 addition of sugar molecules onto the surface-exposed outer-core of the  
72 lipooligosaccharide (LOS) (5, 7). PV of the UDP-galactose-LOS-galactosyltransferase  
73 encoding gene, *lic2A*, is mediated by a 5'CAAT repetitive tract present in the open-  
74 reading frame (14). Phage HP1c1 attaches to an LOS epitope of *H. influenzae* strain Rd  
75 that contains the galactose sugar added by *lic2A* (15). PV of *lic2A* causes switching  
76 between phage sensitive (*lic2A* ON) and phage resistant states (*lic2A* OFF) (15, 16).  
77 Partial resistance to phage HP1c1 in strain Rd is also mediated by PV of a Type I  
78 restriction-modification (RM) system. PV of surface receptors and RM systems generates  
79 resistance to phage infection in several bacterial species (17–22).

80 While phage-receptor PV prevents viral propagation in individual populations, the  
81 frequency and distribution of resistant variants within larger meta-populations may also  
82 impose inhibitory effects on phage spread through multiple spatially-linked sub-  
83 populations. In order to explore this potential benefit, we examined how diversity in  
84 phage resistance/sensitivity phenotypes generated by one hypermutable locus, *lic2A*,  
85 alters spread of phage HP1c1.

86

## 87 **RESULTS**

### 88 **Low numbers of resistant bacterial populations significantly restrict phage spread**

89 **and densities.** PV can generate high levels of ON and OFF variants of single genes

90 within individual populations but also has the potential to generate population-to-

91 population variation within a meta-population. For example, *lic2A*-positive *H. influenzae*

92 colonies on agar plates will have most cells in a *lic2A* ON expression state but will also

93 contain small, but significant, numbers of *lic2A* OFF variants. Similarly, an *H. influenzae*  
94 meta-population may consist of multiple sub-populations with one fraction being *lic2A*-  
95 positive and another fraction being *lic2A*-negative. Such population-to-population  
96 variation is observed for *H. influenzae* colonies on agar plates and for *H. influenzae*  
97 populations isolated from artificially-inoculated animals and asymptomatic human  
98 carriers (23–27). Proportions of ON and OFF sub-populations in a meta-population will  
99 depend on levels of selection for each expression state and on ‘founder’ effects that  
100 influence the starting state of each sub-population. Thus, any phage invading a bacterial  
101 meta-population where there is PV of the receptor must contend with highly variable  
102 distributions of resistance and sensitive sub-populations.

103 To simulate the effect of phage-receptor PV on spread of phage through bacterial  
104 meta-populations we developed the ‘oscillating prey assay’ (Fig. 1). This assay involves  
105 continual cycling of phage through *H. influenzae* strain Rd cultures with either a majority  
106 *lic2A* ON or OFF phenotype. Each cycle allows for one round of phage replication after  
107 which the phage-containing supernatant is recovered, filtered, and transferred to a new  
108 culture of either *lic2A* ON or OFF *H. influenzae* cells. During transfer, the supernatant is  
109 subject to a 10-fold dilution. This arbitrary dilution factor simulates loss of phage during  
110 population-to-population transmission.

111 Six population structures were examined in the oscillating prey assay: [1] 100 %  
112 ON (HP1c1 cycled only through *lic2A* ON populations; S100), [2] 66 % ON (2:1 *lic2A*  
113 ON:OFF; S66), [3] 50 % ON (1:1 *lic2A* ON:OFF, starting with an ON culture; S50), [4]  
114 50 % OFF (1:1 *lic2A* ON:OFF, starting with an OFF culture; R50), [5] 66 % OFF (1:2  
115 *lic2A* ON:OFF; R66), and [6] 100 % OFF (HP1c1 cycled only through *lic2A* OFF

116 populations; R100). Survival and propagation of phage was dependent on the proportion  
117 of phage-resistant sub-populations in each series of 20 cycles (Fig. 2). Survival of phage  
118 to the final cycle was only observed when the proportion of phage-resistance populations  
119 was  $\leq 34\%$  (i.e. the S66 and S100 populations; Fig. 2). Extinction events occurred within  
120 5 to 16 cycles in all other heterogeneous and homogeneous populations at a rate that was  
121 dependent on the proportion of resistant sub-populations. Despite survival of phage  
122 through to cycle 20 in the S66 population series, phage densities were significantly  
123 decreased by this cycling regime (Fig. 2; paired *t*-test:  $t = 4.97$ ,  $P < 0.05$ ; mean  $\pm$  SEM  
124 PFU/mL values for phage densities at cycle 0 =  $7.16 \pm 0.26 \times 10^5$  and cycle 20 =  
125  $2.82 \pm 0.9 \times 10^4$ ), indicating that further passages with a similar pattern would have  
126 resulted in phage extinction. Contrastingly, phage density increased when all sub-  
127 populations were phage sensitive (S100), with phage densities plateauing after  $\sim 11$   
128 cycles. Thus, both phage survival and density were limited by the frequency of  
129 encounters with phage-resistant *lic2A* OFF phase variants during passage through a linear  
130 series of sub-populations.

131 **Detection of combinatorial effects of population structure and dilution rate**  
132 **on phage extinction using an *in-silico* model of phage spread.** Our experimental data  
133 indicated that meta-population structure had a major impact on phage survival and  
134 spread. In order to explore a wider range of linear and non-linear cycling patterns and the  
135 effects of dilution rate, we developed a mathematical model of the oscillating prey assay.  
136 This model utilized key phage parameters for adsorption rate, replication time, burst size  
137 and stability of phage HP1c1 (see Fig. S1). The number of oscillations was extended to  
138 105 phage replicative cycles, while cycling patterns were randomised for each specific

139 overall proportion of *lic2A* ON/OFF sub-populations. The mathematical model produced  
140 comparable findings to the experimental setting (Fig. S2). Multiple runs of this model  
141 exhibited stochastic variation in phage densities and extinction events as observed in the  
142 experimental model but with extinction events occurring over a wider band of replication  
143 cycles (Fig. 3A-B). This model demonstrates that random patterns of ON/OFF expression  
144 states for a phage receptor can limit phage spread.

145 Multiple simulations ( $n = 200$ ) were performed for each combination of R (the  
146 percentage of phage-resistant *lic2A* OFF sub-populations) and C (the inverse of the  
147 dilution coefficient). Average phage densities were measured for all cycles and runs of  
148 each combination of R and C, and phage extinction was defined to occur whenever the  
149 density fell below 100 PFU/mL. Phage extinction was always observed when the number  
150 of resistant states exceeded 70% of sub-populations, even at a low dilution rate of 1 in 2  
151 ( $C=0.5$ ; Fig. 3C). Similarly, when phage loss was  $\geq 98\%$  at each transfer (i.e.  $C=0.02$ ),  
152 phage extinction was observed for all meta-population structures except those consisting  
153 of  $>95\%$  phage-sensitive sub-populations (Fig. 3C). Between these extremes, there was  
154 an accelerating trade-off between R and C with respect to phage extinction and average  
155 phage density; decreases in dilution rate were countered by a high prevalence of resistant  
156 sub-populations enabling bacterial populations to survive even when phage dispersal was  
157 low (Fig. 3C). This observation suggests that on-going evolution of localised  
158 hypermutability for a surface-exposed bacterial epitope could be tuned to the prevalence  
159 and density of phages capable of using the phase-variable epitope as a receptor for  
160 surface attachment.

161           **Localised hypermutation-driven herd-immunity produces regional variations**  
162 **in phage densities within bacterial meta-populations.** Both our experimental and *in*  
163 *silico* oscillating prey assays demonstrated that phage spread was influenced by the linear  
164 pattern of phase-variant sub-populations. However, the distribution of phase variants  
165 across a surface (e.g. microcolonies on upper respiratory tract surfaces for *H. influenzae*)  
166 is anticipated to be random and hence to result in spatial effects on phage spread. Indeed,  
167 spatially structured environments are known to restrict phage spread (28). Spatial  
168 structuring was explored by examining phage transmission across meta-populations of  
169 fixed dimensions but with varying proportions of each *lic2A* expression state (Fig. S3).  
170 This fixed-area oscillating prey assay was initiated by inoculating phage into one well of  
171 a 96-well plate and then expanding outward by seeding each subsequent replicative cycle  
172 into neighbouring wells (see Fig. S4).

173           Passage of HP1c1 through heterogeneous populations of the fixed-area oscillating  
174 prey assay resulted in uneven phage densities across the meta-populations consisting of  
175 50-66% phage-sensitive populations (Fig. 4B-4D). Conversely, homogenous densities  
176 were observed for high (Fig. 4A) or low (Fig. 4E and 4F) phage-sensitive distributions.  
177 When 66% of populations were phage-sensitive (Fig. 4B), densities ranged from  $10^3$  to  
178  $10^{10}$  PFU/mL, whereas densities always exceeded  $10^8$  PFU/mL if all population were  
179 sensitive (Fig. 4A). Phage densities in specific regions of heterogeneous populations were  
180 dependent on the direction of propagation with passage through multiple resistant or  
181 sensitive sub-populations resulting in low or high phage densities, respectively. This  
182 model shows how spatial meta-population heterogeneity could prevent equal  
183 dissemination of phage through host populations with phase-variable phage-receptors and



184 aid survival of phage-sensitive sub-populations whose phenotypes may be beneficial for  
185 bacterial survival against other selective pressures.

186 **Observed PV rates generate populations with phase-variant proportions**  
187 **capable of herd-immunity.** The fixed-area oscillating prey assay outputs showed how  
188 phage extinction was dependent on the proportion of phage-resistant sub-populations. *H.*  
189 *influenzae* normally resides in the upper respiratory tract where selection is likely to act  
190 on both PV states of a locus. Thus, the proportion of resistant populations depends on  
191 both selection strength for/against the phage-resistance phenotype, and the ON/OFF  
192 switching rate. Switching rates of *H. influenzae* phase-variable genes are malleable due to  
193 changes in repeat number and can evolve in response to alternating selection pressures  
194 (28, 29).

195 A mathematical model was developed to examine the impact of different  
196 switching rates and immune selection on the proportions of *lic2A* expression states (Fig. 5  
197 and Supplementary Data S1). Dixon *et al.* (30) found that the *lic2A* ON-to-OFF (S-to-R;  
198 where R and S are the phage-resistant and phage-sensitive states, respectively) switching  
199 rate was 1.7-fold higher than the *lic2A* OFF-to-ON (R-to-S) switching rate. The  
200 mathematical model assumed that these proportions were maintained for three 10-fold  
201 differences in overall mutation rate representing low, intermediate and high repeats  
202 numbers (Fig. 5A-5C). In the absence of any selective difference between the S and R  
203 states ( $m=1$ ), a high, steady-state proportion (>63%) of R, was observed for all mutation  
204 rates but with minor differences in the rate of approach to the steady state and absolute  
205 amounts of R. The *lic2A* OFF state (i.e. R) is known to be more immune sensitive than  
206 the ON state (i.e. S), we therefore imposed a selection against R. Even with strong

207 selection ( $m=0.99$ ), high levels of R were maintained by medium to high switching rates  
208 (Fig. 5A and 5C, respectively). In contrast, when switching rates were low (Fig. 5B),  
209 even weak selection ( $m=0.999$ ) drives resistant variants to  $<1\%$  (Fig. 5B). Our other *in*  
210 *silico* models indicated that phage spread was inhibited when the probability of  
211 encountering R variants was between 10-70% for dilution rates of 0.02 to 0.6. Thus, the  
212 immune model shows that observed repeat numbers and switching rates for the *lic2A*  
213 gene of *H. influenzae* strains can maintain sufficient phage-resistant variants for  
214 restricting phage spread even when there is immune selection against this state.

215

## 216 **DISCUSSION**

217       Hypermutable loci have well-documented roles in facilitating survival of  
218 individual bacterial populations against phage predation through generation of phage-  
219 resistant cells. An unexplored concept is that hypermutation driven heterogeneity in  
220 phage resistance across the wider population also facilitates bacterial survival of phage  
221 predation.

222       **Phase-variable loci can generate herd immunity in bacterial meta-**  
223 **populations.** The concept of herd immunity was derived to explain the protection of  
224 susceptible individuals in populations with high levels of immunity to an infectious agent  
225 as observed for measles in Baltimore (31). Ordinarily applied to naturally or vaccine-  
226 acquired immunity to infectious agents in human populations (32), we show, herein, that  
227 repeat-mediated PV of a phage-receptor provides a form of ‘bacterial herd-immunity’ at  
228 the population level (Fig. 6). Thus, phage spread is retarded by resistant sub-populations  
229 creating barriers between the phage and phage-sensitive bacterial sub-populations as

230 shown in our one- and multidirectional experimental models (Fig. 2 and Fig. 5), and an *in*  
231 *silico* model with randomized patterns of phage sensitivity (Fig. 3). Key features of these  
232 models were that: the chance of phage survival was inversely proportional to the linear  
233 pattern of resistance faced by the phage population; random distributions of phage-  
234 resistant/sensitive populations result in large variations in viral numbers across a meta-  
235 population with some regions being completely free of phage; and dilution during  
236 transfer of phage between populations modulates the number of phage-resistant  
237 populations required to retard phage spread. Thus, localised hypermutation of a phage-  
238 receptor generates herd-immunity whereby phage-sensitive sub-populations can be  
239 maintained at high levels within bacterial meta-populations.

240 PV of phage receptors or RM systems is an established phenomenon observed  
241 across numerous species and occurring by multiple mechanism. Repeat-mediated  
242 switching due to hypermutation of polyG tracts in phage receptor genes of *C. jejuni* strain  
243 NCTC11168 abrogates infection by phage F336 (19). Similar polyG hypermutation  
244 controls the phage growth limitation system of *Streptomyces coelicor* A3(2) and confers  
245 resistance to infection with phage  $\phi$ C31 (33). Epigenetic PV of Ag43 in *E. coli* or the  
246 *gtr*<sup>P22</sup> operons that control O-antigen modification in *Salmonella* are known or proposed  
247 to modulate phage infection (34, 35). High frequency, but not hypermutable, mutations in  
248 short polyG or polyA tracts produce resistance to phages in both *Bordetella pertussis* (36)  
249 and *Vibrio cholerae* (17). Although these mechanisms vary in the rates of generation of  
250 phage resistant variants and in the strength of phage resistance (e.g. high for receptor PV  
251 and low for RM PV), they all have the potential to generate spatially-structured  
252 populations and hence herd immunity to phage infection.

253            Additionally, there is potential for evolution of the herd immunity state. PV rates  
254 can evolve through changes in the mutable mechanism. Thus repeat-mediated PV rates  
255 increase as a function of tract length. We anticipate that frequent exposure to phage  
256 would select for a greater capacity to form heterogeneous meta-populations through  
257 secondary selection for an increase in mutability of the phage receptor.

258            **Evidence for immune-driven selection of *lic2A* ON expression states.** One  
259 rationale for the existence of PV-driven herd immunity is that protection of the phage-  
260 sensitive state is required because this state is advantageous under certain circumstances.  
261 For *lic2A*, the ON state in *H. influenzae* strain Rd is phage-sensitive and this state leads  
262 to extension of the LOS side-chain from the third heptose with a single galactose, a  
263 digalactose or more complex sugars. In *in vitro* studies, *lic2A*-dependent epitopes aid in  
264 survival against human immune responses (16), with the LOS extensions associated with  
265 *lic2A* expression encoding epitopes also present on the human P blood group antigens  
266 (37). Although human volunteer studies of colonisation with *H. influenzae* have found  
267 that expression of *lic2A* was not essential for human nasopharyngeal colonisation (26),  
268 the *lic2A* ON state has been associated with disease states, including non-typeable *H.*  
269 *influenzae* pneumonia (24). We performed an analysis of 104 *H. influenzae* genome  
270 sequences and found that *lic2A* is in an ON state in ~63% of all isolates and is  
271 predominantly in the ON state for multiple disease conditions, suggesting selection for  
272 expression of *lic2A* occurs across a wide range of niches for *H. influenzae* (Fig. S5).  
273 These observations are consistent with a scenario where phage drive evolution of  
274 hypermutability rates as the *lic2A* gene oscillates between selection for/against the  
275 immune-resistant/phage-sensitive and immune-sensitive/phage-resistant states. A caveat

276 to these conclusions is phage-specificity as phage HP1c1 may be specific to extension of  
277 the third heptose of *H. influenzae* LOS whereas Lic2A can, in the appropriate genetic  
278 context, generate extensions from any of the three heptoses of the LOS inner core.  
279 Further work is required to determine whether HP1c1 is specific for extension from the  
280 third heptose and if other phages can target this epitope in *H. influenzae* strains where  
281 extension is from the first or second heptose.

282         **Transmission and the ‘phage loss’ phenomenon.** Our mathematical model of  
283 herd immunity indicates that phage spread is interdependent on population structure and  
284 the rate of phage loss from the environment by dilution. Thus, when dilution rates are  
285 high, phage extinction events are frequent despite high levels of sensitivity within the  
286 bacterial population. While natural rates of phage loss from respiratory environments is  
287 unknown, a number of factors have the capacity to impact phage loss, such as humidity,  
288 salinity and immune responses (38–41). For phage infections of human commensals or  
289 pathogens, such as *H. influenzae*, more extreme environmental selection pressures will  
290 apply as phages are transmitted between carriers of target bacterial species.

291         There are two potential extreme scenarios where the herd immunity model is  
292 applicable and ‘phage loss’ is either low or high. These scenarios are elaborated for *H.*  
293 *influenzae* but are relevant to other bacterial commensals/pathogenic bacteria. Firstly,  
294 colonisation of asymptomatic carriers by *H. influenzae* is likely to involve a series of  
295 microcolonies, a meta-population, distributed across the nasopharyngeal surface rather  
296 than one continuous population. Phage will therefore have to transmit between  
297 microcolonies thereby imposing a low potential for phage loss such that only high  
298 numbers of phage-resistant populations will provide protection for any phage-sensitive

299 microcolonies. A second scenario is a population of *H. influenzae* carriers, in this case  
300 phage transmission between carriers is likely to result in significant phage loss and hence  
301 low numbers of carriers colonized by phage-resistant populations could prevent phage  
302 spread to all carriers. These scenarios illustrate the central role of transmission in shaping  
303 bacterial herd immunity and in the impact of this fitness trait on localised hypermutation  
304 of the phage receptor.

305 **Bacterial herd immunity could impact on phage-driven evolution.** We  
306 observed that phage densities were highly variable across spatially-structured bacterial  
307 populations with some regions exhibiting a complete absence of phage (Fig. 6). This  
308 imposition of spatially-discrete levels of phage selection could select for alternative  
309 adaptive traits within the bacterial host. In studies of *Caulobacter crescentus*, low phage  
310 selection led to isolation of >200 phage resistance mechanisms, while only ~60 distinct  
311 resistance forms were isolated during high phage selection (42). Thus, bacterial herd-  
312 immunity may prevent uniformity in phage selection pressures across bacterial meta-  
313 populations leading to evolution of distinct phage-resistance mechanisms within a single  
314 clonal lineage.

315 In summary, our demonstration of a hypermutable locus retarding spread of an  
316 infectious agent within a prokaryotic meta-population suggests that the herd immunity  
317 phenomenon may be applicable to a wide variety of interacting biological organisms and  
318 have deep evolutionary roots. Our conceptual framework could be utilised to explore  
319 whether somatic hypermutation, a key example of localised hypermutation in eukaryotes,  
320 evolved through selection for sub-population heterogeneity linked to pathogen resistance.

321

## 322 MATERIALS AND METHODS

323 **Phage and bacterial strains used in this study.** Phage HP1c1, and the *lic2A* ON  
324 (Rd 30S) and OFF (Rd 30R) phase variants of *H. influenzae* were obtained from A.  
325 Piekarowicz (University of Warsaw, Poland). Phage HP1c1 is maintained in the  
326 lysogenic state within *H. influenzae* RM118-L. *H. influenzae* strains were cultured  
327 overnight at 37°C on 1% BHI agar supplemented with 10% Leventhal's supplement and  
328 2 µg/mL nicotinamide adenine dinucleotide (NAD) or in 10 mL BHI broth supplemented  
329 with 2 µg/mL NAD and 10 µg/mL hemin (sBHI).

330 **Phage HP1c1 stocks.** Mitomycin C was added to a concentration of 300 ng/mL to  
331 an OD<sub>600</sub> 0.1 culture of RM118-L in 10 ml of sBHI. After incubation for 8 hours, the  
332 culture was centrifuged (4,946xg, 4°C, 10 minutes) and then the supernatant was passed  
333 through a 0.22 µm syringe filter to obtain a phage suspension, which was stored at 4°C.

334 High titer phage stocks were propagated in *H. influenzae* Rd 30S by adding 100 µL  
335 of induced phage to mid-log phase cultures diluted to an OD<sub>600</sub> of 0.01 in 10 ml sBHI and  
336 incubating for 8 hours. Cultures were processed as described above.

337 **Determination of phage titers.** Phage titers were determined using the small-drop  
338 plating assay (43). Briefly, 150 µl of a mid-log phase Rd 30S culture, OD<sub>600</sub> 0.1, was  
339 added to 3 mL of 0.3 % BHI agar (supplemented with 2 µg/mL NAD and 10 µg/mL  
340 hemin), mixed by inversion, and poured onto 1% BHI agar plates supplemented with  
341 10% Leventhal's media and 2 µg/mL NAD. Ten-fold serial dilutions were spotted in  
342 triplicate 10 µl drops onto the soft agar (the minimum detection threshold is 33.3  
343 PFU/mL).

344           **Oscillating prey assay.** Two phase variants, namely, Rd 30S (*lic2A* ON, phage  
345 sensitive variant) and Rd 30R (*lic2A* OFF, phage resistant variant) were utilized to  
346 generate the following three-repeat host population-cycling patterns: S100, ON-ON-ON;  
347 S66, ON-ON-OFF; S50, ON-OFF-ON; R50, OFF-ON-OFF; R66, OFF-OFF-ON; R100,  
348 OFF-OFF-OFF. *H. influenzae* Rd 30S and Rd 30R were sub-cultured as described above  
349 in 20 mL of sBHI to an OD<sub>600</sub> of 0.1. A 5 mL aliquot of the relevant strain was inoculated  
350 with HP1c1 at MOI ~0.01. Cultures were adjusted to 6 mL, mixed by inversion and 1 mL  
351 was removed for filtration and determination of the T = 0 phage titre. The remaining 5  
352 mL was incubated for 50 minutes (i.e. one viral replication cycle) at 37°C with shaking  
353 and then filtered for phage quantification. Subsequent cycles were initiated by  
354 transferring 600 µl of filtrate to a fresh 5 mL culture of relevant *lic2A* phase variant. Five  
355 phage transfers were conducted per day with phage-containing filtrates being stored  
356 overnight at 4°C.

357           **Fixed-area oscillating prey assay.** Six cycling frequencies were tested (Fig. 5).  
358 Allocation of each phase variant (i.e. Rd 30S or Rd 30R) to specific wells was  
359 determined by numbering wells from 1 to 631 followed by randomization of these  
360 numbers into two sets using R (see Fig. S3). One phase variant was added to the first set  
361 of numbered wells and the other phase variant to the second set.

362           Rd 30S and Rd 30R were sub-cultured to OD<sub>600</sub> 0.1 and then 250 µL of appropriate  
363 culture was added to the starter well. Phage HP1c1 was added at a final concentration of  
364 ~1 x 10<sup>6</sup> PFU/mL to this well and the volume was adjusted to 300 µL with fresh sBHI  
365 broth. After mixing by titration, 100 µL was removed for phage titration. The plate was  
366 incubated at 37°C with shaking for 70 minutes (a longer incubation time was required in



367 this miniaturised oscillating prey assay for completion of one phage replication cycle  
368 [data not shown]). Following incubation, the plate was centrifuged at 1500 x g for 4  
369 minutes to pellet bacterial cells and then 20  $\mu$ l of supernatant was transferred to  
370 surrounding wells (see Fig. S4). Remaining supernatant was harvested for phage titration.  
371 Newly-inoculated wells received 167  $\mu$ l of a fresh OD<sub>600</sub> 0.1 culture of either Rd 30S or  
372 Rd 30R, depending on the cycling pattern, followed by repetition of all previously  
373 described steps. Ten cycles were performed in the left, right, and downward directions,  
374 and 20 cycles in the upward direction (see Fig. S3 and S4). Five transfers and cycles were  
375 conducted each day with the 96-well plates being wrapped in paraffin film and stored at  
376 4°C overnight. This assay was conducted once for each population structure.

377 **Survey of Lic2A expression state in multiple *H. influenzae* genomes.** A set of  
378 126 genomes available in GenBank as of 06-09-2016 were screened with blast2seq for  
379 the presence of genes homologous to the *lic2A* gene of *H. influenzae* strain Rd KW20.  
380 *Lic2A* homologues were found in 121 of the 126 genomes but only 104 could be analysed  
381 due to incomplete sequence coverage in 17 genomes. The ON state was identified by the  
382 presence of a full length amino acid product (~300 amino acids). The 5'CAAT repeat  
383 numbers were determined by visual inspection of aligned sequences. All metadata, where  
384 available, was collated from the GenBank entry for each genome, or references  
385 associated with each strain.

386 **Mathematical model and simulations.** We describe bacteria-phage interaction  
387 using the conventional modelling approach (45, 46). Dynamics of bacteria and phage  
388 densities in each experimental cycle (transfer) of number  $n$  within time  $T_{\theta}=40\text{min}$  (i.e.  
389 before the start of mass replication of phages) is given by

$$390 \quad \frac{dB_0}{dt} = -KPB_0,$$

$$391 \quad \frac{dB_i}{dt} = KPB_{i-1} - KPB_i, \quad i = 1, \dots, N-1$$

$$392 \quad \frac{dB_N}{dt} = KPB_{N-1},$$

$$393 \quad \frac{dP}{dt} = -PK \sum_{i=0}^{N-1} B_i - mP, \quad nT < t < Tn + T_0,$$

394 where  $B_0$  is the number/density of phage-free bacteria;  $B_i$  is the number/density of  
 395 bacteria with  $i$  phage attachments;  $P$  is the number/density of free phages. The maximal  
 396 number of phage attachments for an individual bacterial cell is given by  $N$ . In the model,  
 397 we assume that the injection rate is very fast (i.e. instantaneous), so that attachment of  
 398 one phage immediately results in an infection.

399 For simplicity, we assume that there is no bacterial growth. We also assume that all  
 400 phage attachments occurring within the first 10 minutes lead to replication (each phage  
 401 produces  $b$  new phages) whereas later attachments result in phage loss without  
 402 replication. We neglect binding of newly replicated phages within the last  $\Delta = 10$  min of  
 403 each cycle. The other model parameters are:  $K$ , phage adsorption constant (note that this  
 404 constant is assumed to be independent from the number of bound phages and that  $K=0$  for  
 405 phage-resistant bacteria);  $m$ , natural mortality of phages;  $b$ , phage burst size.

406 At the start of each experimental cycle (i.e. just after dilution) all bacteria are phage-  
 407 free and their number is always equal to  $B_s$ , in other words,

$$408 \quad B_0(t = (Tn)^+) = B_s, \quad B_i(t = (Tn)^+) = 0, \quad B_i(t = (Tn)^+) = 0, \quad i=1, \dots, N,$$

409 Here the symbol ‘+’ denotes the time just after the  $n^{\text{th}}$  dilution, i.e. just prior to the  
410 cycle  $(n+1)$ ; the symbol ‘-’ denotes the time prior to the  $n^{\text{th}}$  dilution, i.e. at the very end  
411 of cycle  $n$ .

412 The phage density is obtained from the final density in each cycle multiplied by the  
413 dilution coefficient  $C_n$  in cycle  $\#n$  (this value can vary between experiments).

$$414 \quad P(t = (T_n)^+) = P(t = (T_n)^-) C_n .$$

415 The density of phages just prior to dilution  $n$  (i.e. at the end of cycle  $\#n$ ) is  
416 determined by

$$417 \quad P(t = (T_n)^-) = \sum_{i=1}^N B_i (T_n - T_0) b + P_S(t = (T_n)^-) ,$$

418 where  $P_S$  are non-attached phages that survived to the end of the cycle; i.e. the phage  
419 number at the cycle end, prior to dilution, is given by the number of infected bacteria at  
420 time  $T - T_0$  multiplied by the burst size  $b$  plus the number of surviving phages  $P_S$ .

421 Susceptible bacteria are characterized by  $K > 0$ , whereas for resistant bacteria we  
422 have  $K = 0$ . The value of  $K$  is kept constant across each cycle of 50 minutes.

423 Model parameters and verification were derived from experimental settings or  
424 findings. Direct observations indicated that  $B_S = 1.75 \pm 0.25 \times 10^8$  cell/ml,  $T = 50$  min, and  
425  $T_0 = 40$  min. The adsorption constant of  $K = 7 \pm 3 \times 10^{-10}$  mL/(cell min) was estimated from  
426 an adsorption assay (Fig. S1). Other parameters were estimated directly from the  
427 oscillating prey assay by model fitting (see Fig. S2):  $b = 42 \pm 5$  (burst size); and  
428  $m = 0.006 \pm 0.003$  1/min. The parameter  $N$  had a minor effect in our computation and hence  
429 we utilised  $N = 20$  in all subsequent models.

430 Further simulations (e.g. Fig. 3c) considered the phage-bacterial dynamics across  
431 105 cycles. Variations in the dilution rate  $C$  were simulated by changing the value of  $C$   
432 according to  $C=C^*(1+\varepsilon)$ , where  $\varepsilon$  is a normally distributed random variable with a mean  
433 of 0. and variance of  $0.3^2$ . In each cycle,  $K$  was randomly switched from  $K=7*10^{-10}$   
434 (susceptible bacteria) to  $K=0$  (resistant bacteria). The frequency of switching was  
435 determined by the probability  $p$ , which gives the probability of encountering susceptible  
436 bacteria. Examples simulations, shown in Fig. 3a and 3b, were constructed for  $C=0.1$ ,  
437  $p=0.75$  (A)  $p=0.85$  (B). Fig. 3c was obtained by repeating simulations across 105 for  
438 variable parameters  $C$  and  $p$ . Numerical simulation was based on the standard Runge-  
439 Kutta integration method of order 4 using MATLAB software. When phage density  
440 dropped to or below the low value threshold of  $P_0=100$ , we considered that this was  
441 equivalent to  $P=0$  and stopped further simulations. The initial density of phages at time  
442  $t=0$  was  $4.28*10^7$  PFU/mL.

443

#### 444 **FUNDING INFORMATION**

445 C.J.R.T. was supported by the Biotechnology and Biological Sciences Research Council  
446 (BBSRC) [BB/J014532/1] and the College of Life Sciences of the University of  
447 Leicester.

448

#### 449 **REFERENCES**

- 450 1. van Valen L. 1973. A new evolutionary law. *Evol Theory* 1:1–30.
- 451 2. Moxon ER, Rainey PB, Nowak MA, Lenski RE. 1994. Adaptive evolution of  
452 highly mutable loci in pathogenic bacteria. *Curr Biol* 4:24–33.

- 453 3. Bayliss CD. 2009. Determinants of phase variation rate and the fitness  
454 implications of differing rates for bacterial pathogens and commensals. FEMS  
455 Microbiol Rev 33:504–20.
- 456 4. Rainey PB, Beaumont HJE, Ferguson GC, Gallie J, Kost C, Libby E, Zhang X-X.  
457 2011. The evolutionary emergence of stochastic phenotype switching in bacteria.  
458 Microb Cell Fact 10 Suppl 1:S14.
- 459 5. Moxon ER, Bayliss CD, Hood DW. 2006. Bacterial contingency loci: the role of  
460 simple sequence DNA repeats in bacterial adaptation. Annu Rev Genet 40:307–33.
- 461 6. van der Woude MW, Bäumler AJ. 2004. Phase and antigenic variation in bacteria.  
462 Clin Microbiol Rev 17:581–611, table of contents.
- 463 7. Power PM, Sweetman W a, Gallacher NJ, Woodhall MR, Kumar G a, Moxon ER,  
464 Hood DW. 2009. Simple sequence repeats in *Haemophilus influenzae*. Infect  
465 Genet Evol 9:216–28.
- 466 8. Bayliss CD, Field D, Moxon ER. 2001. The simple sequence contingency loci of  
467 *Haemophilus influenzae* and *Neisseria meningitidis*. J Clin Invest 107:657–62.
- 468 9. Kroll JS, Moxon ER. 1988. Capsulation and gene copy number at the cap locus of  
469 *Haemophilus influenzae* type b. J Bacteriol 170:859–64.
- 470 10. Ren Z, Jin H, Whitby PW, Morton DJ, Stull TL. 1999. Role of CCAA nucleotide  
471 repeats in regulation of hemoglobin and hemoglobin-haptoglobin binding protein  
472 genes of *Haemophilus influenzae*. J Bacteriol 181:5865–70.
- 473 11. Dawid S, Barenkamp SJ, St Geme JW. 1999. Variation in expression of the  
474 *Haemophilus influenzae* HMW adhesins: a prokaryotic system reminiscent of  
475 eukaryotes. Proc Natl Acad Sci U S A 96:1077–82.

- 476 12. Glover SW, Piekarowicz A. 1972. Host specificity of DNA in *Haemophilus*  
477 *influenzae*: restriction and modification in strain Rd. *Biochem Biophys Res*  
478 *Commun* 46:1610–7.
- 479 13. De Bolle X, Bayliss CD, Field D, Van De Ven T, Saunders NJ, Hood DW, Moxon  
480 ER. 2000. The length of a tetranucleotide repeat tract in *Haemophilus influenzae*  
481 determines the phase variation rate of a gene with homology to type III DNA  
482 methyltransferases. *Mol Microbiol* 35:211–222.
- 483 14. High NJ, Deadman ME, Moxon ER. 1993. The role of a repetitive DNA motif (5'-  
484 CAAT-3') in the variable expression of the *Haemophilus influenzae*  
485 lipopolysaccharide epitope alpha Gal(1-4)beta Gal. *Mol Microbiol* 9:1275–82.
- 486 15. Zaleski P, Wojciechowski M, Piekarowicz A. 2005. The role of Dam methylation  
487 in phase variation of *Haemophilus influenzae* genes involved in defence against  
488 phage infection. *Microbiology* 151:3361–9.
- 489 16. Clark SE, Eichelberger KR, Weiser JN. 2013. Evasion of killing by human  
490 antibody and complement through multiple variations in the surface  
491 oligosaccharide of *Haemophilus influenzae*. *Mol Microbiol* 88:603–18.
- 492 17. Seed KD, Faruque SM, Mekalanos JJ, Calderwood SB, Qadri F, Camilli A. 2012.  
493 Phase variable O antigen biosynthetic genes control expression of the major  
494 protective antigen and bacteriophage receptor in *Vibrio cholerae* O1. *PLoS Pathog*  
495 8:e1002917.
- 496 18. Cota I, Blanc-Potard AB, Casadesús J. 2012. STM2209-STM2208 (opvAB): a  
497 phase variation locus of *Salmonella enterica* involved in control of O-antigen  
498 chain length. *PLoS One* 7:e36863.

- 499 19. Sørensen MCH, van Alphen LB, Harboe A, Li J, Christensen BB, Szymanski CM,  
500 Brøndsted L. 2011. Bacteriophage F336 recognizes the capsular phosphoramidate  
501 modification of *Campylobacter jejuni* NCTC11168. *J Bacteriol* 193:6742–6749.
- 502 20. Anjum A, Brathwaite KJ, Aidley J, Connerton PL, Cummings NJ, Parkhill J,  
503 Connerton I, Bayliss CD. 2016. Phase variation of a Type IIG restriction-  
504 modification enzyme alters site-specific methylation patterns and gene expression  
505 in *Campylobacter jejuni* strain NCTC11168. *Nucleic Acids Res* gkw019.
- 506 21. Sekulovic O, Ospina Bedoya M, Fivian-Hughes AS, Fairweather NF, Fortier L-C.  
507 2015. The *Clostridium difficile* cell wall protein CwpV confers phase-variable  
508 phage resistance. *Mol Microbiol* 98:329–342.
- 509 22. Latino L, Midoux C, Hauck Y, Vergnaud G, Pourcel C. 2016. Pseudolysogeny and  
510 sequential mutations build multiresistance to virulent bacteriophages in  
511 *Pseudomonas aeruginosa*. *Microbiology* 162:748–63.
- 512 23. High NJ, Jennings MP, Moxon ER. 1996. Tandem repeats of the tetramer 5'-  
513 CAAT-3' present in *lic2A* are required for phase variation but not  
514 lipopolysaccharide biosynthesis in *Haemophilus influenzae*. *Mol Microbiol*  
515 20:165–74.
- 516 24. Weiser JN, Pan N. 1998. Adaptation of *Haemophilus influenzae* to acquired and  
517 innate humoral immunity based on phase variation of lipopolysaccharide. *Mol*  
518 *Microbiol* 30:767–75.
- 519 25. Hosking SL, Craig JE, High NJ. 1999. Phase variation of *lic1A*, *lic2A* and *lic3A* in  
520 colonization of the nasopharynx, bloodstream and cerebrospinal fluid by  
521 *Haemophilus influenzae* type b. *Microbiology* 145 ( Pt 1:3005–11.

- 522 26. Poole J, Foster E, Chaloner K, Hunt J, Jennings MP, Bair T, Knudtson K,  
523 Christensen E, Munson RS, Winokur PL, Apicella MA. 2013. Analysis of  
524 nontypeable *Haemophilus influenzae* phase-variable genes during experimental  
525 human nasopharyngeal colonization. *J Infect Dis* 208:720–7.
- 526 27. Fox KL, Attack JM, Srikhanta YN, Eckert A, Novotny L a, Bakaletz LO, Jennings  
527 MP. 2014. Selection for phase variation of LOS biosynthetic genes frequently  
528 occurs in progression of non-typeable *Haemophilus influenzae* infection from the  
529 nasopharynx to the middle ear of human patients. *PLoS One* 9:e90505.
- 530 28. Brockhurst M, Buckling A, Rainey PB. 2006. Spatial heterogeneity and the  
531 stability of host-parasite coexistence. *J Evol Biol* 19:374–9.
- 532 29. Palmer M, Lipsitch M, Moxon ER, Bayliss CD. 2013. Broad conditions favor the  
533 evolution of phase-variable loci. *MBio*.
- 534 30. Dixon K, Bayliss CD, Makepeace K, Moxon ER, Hood DW. 2007. Identification  
535 of the functional initiation codons of a phase-variable gene of *Haemophilus*  
536 *influenzae*, *lic2A*, with the potential for differential expression. *J Bacteriol*  
537 189:511–21.
- 538 31. Hedrich AW. 1930. The corrected average attack rate from measles among city  
539 children. *Am J Epidemiol* 11:576–600.
- 540 32. Brisson M, Bénard É, Drolet M, Bogaards JA, Baussano I, Vänskä S, Jit M, Boily  
541 M-C, Smith MA, Berkhof J, Canfell K, Chesson HW, Burger EA, Choi YH, De  
542 Blasio BF, De Vlas SJ, Guzzetta G, Hontelez JAC, Horn J, Jepsen MR, Kim JJ,  
543 Lazzarato F, Matthijsse SM, Mikolajczyk R, Pavelyev A, Pillsbury M, Shafer LA,  
544 Tully SP, Turner HC, Usher C, Walsh C. 2016. Population-level impact, herd



- 545 immunity, and elimination after human papillomavirus vaccination: a systematic  
546 review and meta-analysis of predictions from transmission-dynamic models.  
547 Lancet Public Heal 1:e8–e17.
- 548 33. Sumby P, Smith MCM. 2003. Phase variation in the phage growth limitation  
549 system of *Streptomyces coelicolor* A3 (2). J Bacteriol 185:4558–4563.
- 550 34. Gabig M, Herman-Antosiewicz A, Kwiatkowska M, Los M, Thomas MS,  
551 Wegrzyn G. 2002. The cell surface protein Ag43 facilitates phage infection of  
552 *Escherichia coli* in the presence of bile salts and carbohydrates. Microbiology  
553 148:1533–42.
- 554 35. Broadbent SE, Davies MR, van der Woude MW. 2010. Phase variation controls  
555 expression of *Salmonella* lipopolysaccharide modification genes by a DNA  
556 methylation-dependent mechanism. Mol Microbiol 77:337–53.
- 557 36. Liu M. 2002. Reverse Transcriptase-Mediated Tropism Switching in *Bordetella*  
558 Bacteriophage. Science (80- ) 295:2091–2094.
- 559 37. Virji M, Weiser JN, Lindberg AA, Moxon ER. 1990. Antigenic similarities in  
560 lipopolysaccharides of *Haemophilus* and *Neisseria* and expression of a  
561 digalactoside structure also present on human cells. Microb Pathog 9:441–50.
- 562 38. Ehrlich R, Miller S, Idoine LS. 1964. Effects of environmental factors on the  
563 survival of airborne T-3 coliphage. Appl Microbiol 12:479–82.
- 564 39. Dubovi EJ, Akers TG. 1970. Airborne stability of tailless bacterial viruses S-13  
565 and MS-2. Appl Microbiol 19:624–628.
- 566 40. Trouwborst T, de Jong JC. 1973. Interaction of some factors in the mechanism of  
567 inactivation of bacteriophage MS2 in aerosols. Appl Microbiol 26:252–7.

- 568 41. Łusiak-Szelachowska M, Zaczek M, Weber-Dąbrowska B, Międzybrodzki R, Kłak  
569 M, Fortuna W, Letkiewicz S, Rogóż P, Szufnarowski K, Jończyk-Matysiak E,  
570 Owczarek B, Górski A. 2014. Phage neutralization by sera of patients receiving  
571 phage therapy. *Viral Immunol* 27:295–304.
- 572 42. Christen M, Beusch C, Bösch Y, Cerletti D, Flores-Tinoco CE, Del Medico L,  
573 Tschan F, Christen B. 2016. Quantitative Selection Analysis of Bacteriophage  
574  $\phi$ CbK Susceptibility in *Caulobacter crescentus*. *J Mol Biol* 428:419–430.
- 575 43. Mazzocco A, Waddell TE, Lingohr E, Johnson RP. 2009. Enumeration of  
576 bacteriophages using the small drop plaque assay system. *Methods Mol Biol*  
577 501:81–85.
- 578 44. Kropinski AM. 2009. Measurement of the rate of attachment of bacteriophage to  
579 cells, p. 151–155. *In* *Methods in molecular biology* (Clifton, N.J.).
- 580 45. Cairns BJ, Timms AR, Jansen V a a, Connerton IF, Payne RJH. 2009. Quantitative  
581 models of in vitro bacteriophage-host dynamics and their application to phage  
582 therapy. *PLoS Pathog* 5:e1000253.
- 583 46. Krysiak-Baltyn K, Martin GJO, Stickland AD, Scales PJ, Gras SL. 2016.  
584 Computational models of populations of bacteria and lytic phage. *Crit Rev*  
585 *Microbiol* 42:942–68.

586

## 587 **FIGURE LEGENDS**

588 FIG 1. Graphic representation of the oscillating prey assay. This diagram illustrates the  
589 methodology for experimental simulation of phage HP1c1 transmission through a 50 %  
590 ON meta-population structure. Green circles represent a phage-sensitive Rd 30S culture

591 (*lic2A* ON) while pink circles represent a phage-resistant Rd 30R culture (*lic2A* OFF).  
592 (A) Phage are added to an exponential phase culture of the bacterial phase variant with an  
593 OD<sub>600</sub> of 0.01 to a final MOI of 0.01 (i.e.  $\sim 1 \times 10^6$  PFU/mL). (B) Incubation of phage  
594 with host at 37°C for 50 minutes to allow for one viral replicative cycle. (C) Filtration of  
595 the phage-bacteria mix through a 0.22  $\mu$ m filter and titration to determine the phage  
596 density at the end of the cycle. (D) Transfer of 600  $\mu$ L of filtered culture-suspension to  
597 5.4 mL of fresh culture of the appropriate phase variant (in this example Rd 30R). (E)  
598 Incubation of this new culture at 37°C for 50 minutes beyond which the process is  
599 repeated until a total of 20 cycles have been completed.

600

601 FIG. 2. Oscillating prey assay for phage HP1c1 infections of *H. influenzae* strain Rd  
602 populations with varying population structures for *lic2A* expression. Each line represents  
603 cycling of the phage through a defined series of cultures of two *H. influenzae* strain Rd  
604 phase variants, namely Rd30S (S; *lic2A* ON; phage sensitive) and Rd 30R (R; *lic2* OFF;  
605 phage resistant). The population structures are indicated in the legend (e.g. S100, all S;  
606 S66, S-S-R-S-S-R; S50, S-R-S-R; etc.). The phage HP1c1 concentration was determined  
607 at the end of each cycle. Circles represent the phage titre observed from each of five  
608 biological replicates, with the line showing the mean of these replicates.

609

610 FIG. 3. Mathematical model of the impact of sub-population phage resistance/sensitivity  
611 composition and dilution rate on phage extinction events. This model simulates  
612 transmission of phage HP1c1 through meta-populations of *H. influenzae* strain Rd  
613 comprising either phage-sensitive (S, *lic2A* ON) or phage-resistant (R, *lic2A* ON)

614 populations for 105 cycles. In these simulations, the order with which phage met either S  
615 or R populations was random but dependent on the probability of encountering a resistant  
616 population ( $R$ ). Note that the phage population is classified as extinct if the phage titre  
617 falls below the extinction threshold ( $P_0 = 100$ ) with the density being set to 0 for all  
618 remaining subsequent cycles. Panels A and B show examples of model outputs, which  
619 are quantified as phage densities  $\log(P)$ . These graphs show six iterations of meta-  
620 populations comprising either 75% (i.e.  $R = 0.25$ ; panel A) or 85 % (i.e.  $R = 0.15$ ; panel  
621 B) phage-sensitive populations. Panel (C) shows the mean proportion of phage extinction  
622 events occurring in 200 lineages for 200 combinations of probabilities to encounter R  
623 (i.e. 1 = 100 % resistant, 0 = 0 % resistant) and rates of phage loss during transmission  
624 after each cycle (inverse dilution rate,  $C$ ; 0.02 = 2 % of phage carried through in each  
625 transfer). Colour correlations are shown on the bar to the right of the graph with 1  
626 representing no extinction events while 0 is extinction in all lineages.

627

628 FIG. 4. Illustration of phage survival in spatially-structured sub-populations of *lic2A*  
629 phase variants of *H. influenzae*. Phage HP1c1 was passaged through a two-dimensional  
630 array of phage-resistant (R) and phage-sensitive (S) populations. The proportion of phage  
631 sensitive sub-populations (*lic2A* ON) in each fixed area structure were as follows: (A)  
632 100 % *lic2A* ON (S100); (B) 66 % *lic2A* ON (S66); (C) 50 % *lic2A* ON (S50); (D) 50 %  
633 *lic2A* ON (R50); (E) 33 % *lic2A* ON (R66); and (F) 0 % *lic2A* ON (R100). Each node  
634 represents a well in which phage density was measured. The colour of each node  
635 indicates the concentration of bacteriophage detected in a specific well. Lines indicate the  
636 route taken starting from a central initiator well with line length being proportional to the

637 number of cycles between each node. All central initiator wells were inoculated with  $10^6$   
638 PFU/mL. (G) shows a box-plot of the distribution of phage densities for each tested well  
639 of the fixed-area oscillating prey assays. Densities of phage (PFU/mL) obtained from  
640 each test well are represented by a dot for the six distributions of *lic2A* phase variants (x-  
641 axis). The boxed area indicates the first to third quartile, the line is the median of all  
642 points, and whiskers represent 1.5x the interquartile range. Due to the nature of the small-  
643 drop plating methodology employed for phage enumeration the minimum detection  
644 threshold at any time point is  $3.3 \times 10^1$  PFU/mL.

645

646 FIG. 5 Model of the temporal fluctuations in the relative amounts of phage-sensitive and  
647 phage-resistant phase variants for a range of PV rates and selection pressures. PV of the  
648 *lic2A* gene results in switching between phage-sensitive (S, *lic2A* ON) and phage-  
649 resistant (R, *lic2A* OFF) phase variants. The *lic2A* ON state is however known to mediate  
650 serum resistance (see text). This model examines how the rate of *lic2A* PV ( $\beta$ , ON-to-  
651 OFF switching;  $\alpha$ , OFF-to-ON switching; note that switching rates were obtained from  
652 Dixon *et al.* [30]) and the degree of selection ( $m$ ) against the *lic2A* OFF (i.e. R, the  
653 phage-resistant state) expression state influences the relative amounts of the R and S  
654 states in a population. All panels show changes in the proportion of R. Three different  
655 switching rates were examined:  $\beta = 1.89 \times 10^{-4}$ ,  $\alpha = 1.13 \times 10^{-4}$  (A);  $\beta = 1.89 \times 10^{-5}$ ,  $\alpha =$   
656  $1.13 \times 10^{-5}$  (B);  $\beta = 1.89 \times 10^{-3}$ ,  $\alpha = 1.13 \times 10^{-3}$  (C).

657

658 FIG 6. Phase variation of phage resistance genes generates ‘bacterial herd-immunity’ in  
659 bacterial meta-populations. Phase variation of a phage-receptor can generate

660 heterogeneous bacterial meta-populations containing a mix of sub-populations that are  
661 either susceptible or resistant to phage infection. High proportions of resistant sub-  
662 populations can both hinder phage spread and protect susceptible populations from phage  
663 attack. In this figure, we show the routes of phage dissemination through four different  
664 bacterial meta-populations. Green circles represent phage-sensitive populations while pink  
665 circles are phage-resistant populations i.e. *lic2A* ON and OFF populations in our  
666 experimental system. Lines with arrowheads show infection events leading to successful  
667 phage replication, while lines with barheads represent directions where phage-resistant  
668 populations act as a barricade blocking phage spread. Regions free of arrows are those free  
669 of phage. Phage spread is shown for: (A) a 100% phage-sensitive (*lic2A* ON) sub-  
670 population; (B) 66% phage-sensitive (*lic2A* ON) sub-populations; (C) 66% phage-resistant  
671 (*lic2A* OFF) sub-populations; and (D) 100% phage-resistant (*lic2A* OFF) sub-populations.

672

### 673 **Supplemental material**

674 Fig. S1 Parameter setting experiments for mathematical modelling.

675 Fig. S2 Fit of mathematical model to experimental data.

676 Fig. S3 Distribution of wells receiving a *lic2A* ON or *lic2A* OFF phase variant of *H.*

677 *influenzae* strain Rd for the 50 % ON (panel A) and 66 % ON (panel B) population

678 structures.

679 Fig. S4 Sampling and transfer regimes for testing phage expansion over a fixed area.

680 Text S1. Modelling the dynamics of PV of the *lic2A* gene of *H. influenzae*

681 Fig. S5 Putative ON/OFF state of the *lic2A* gene from 104 *H. influenzae* strains.

**Fig. 1 Graphic representation of the oscillating prey assay.**

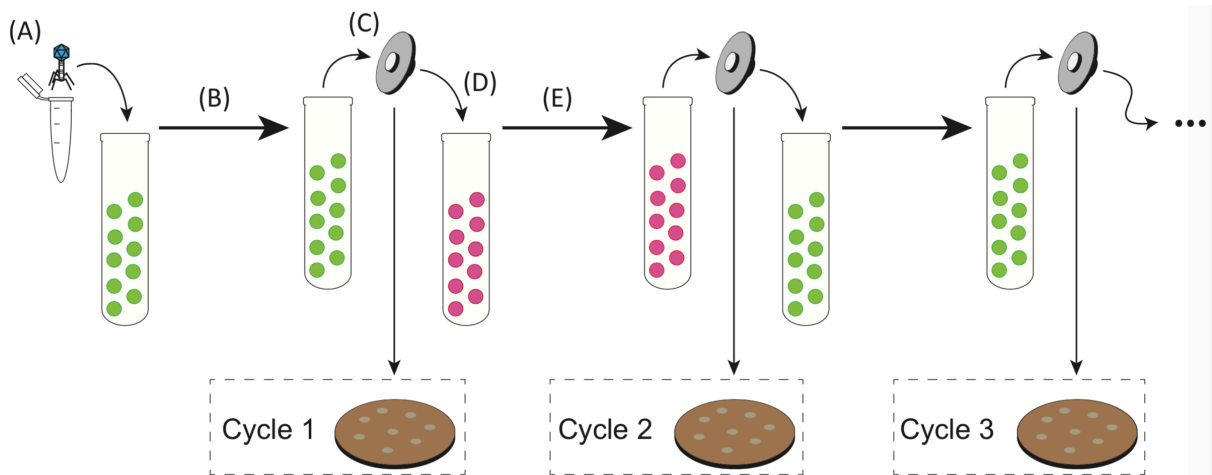

**Fig. 2. Oscillating prey assay for phage HP1c1 infections of *H. influenzae* strain Rd populations with varying population structures for *lic2A* expression.**

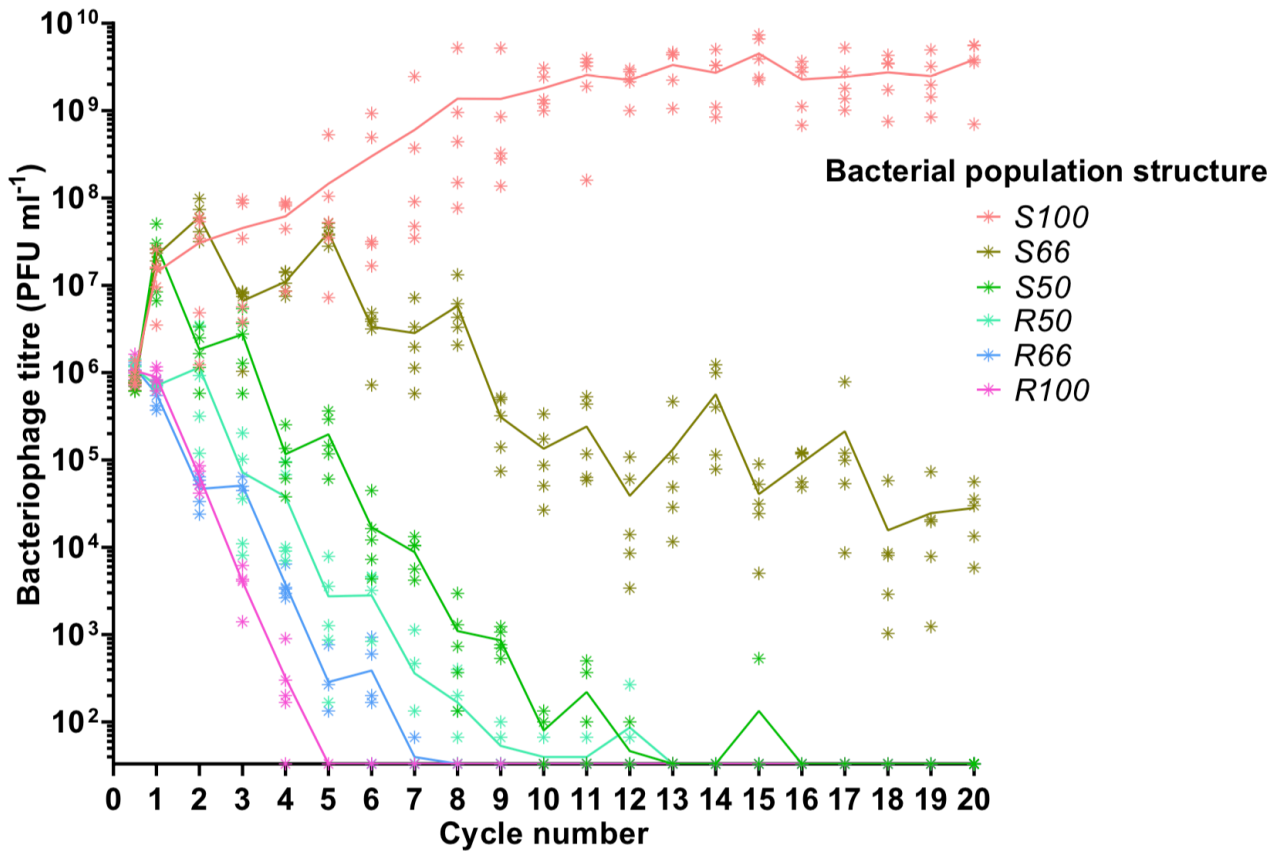



**Fig. 3. Mathematical model of the impact of sub-population phage resistance/sensitivity composition and dilution rate on phage extinction events.**

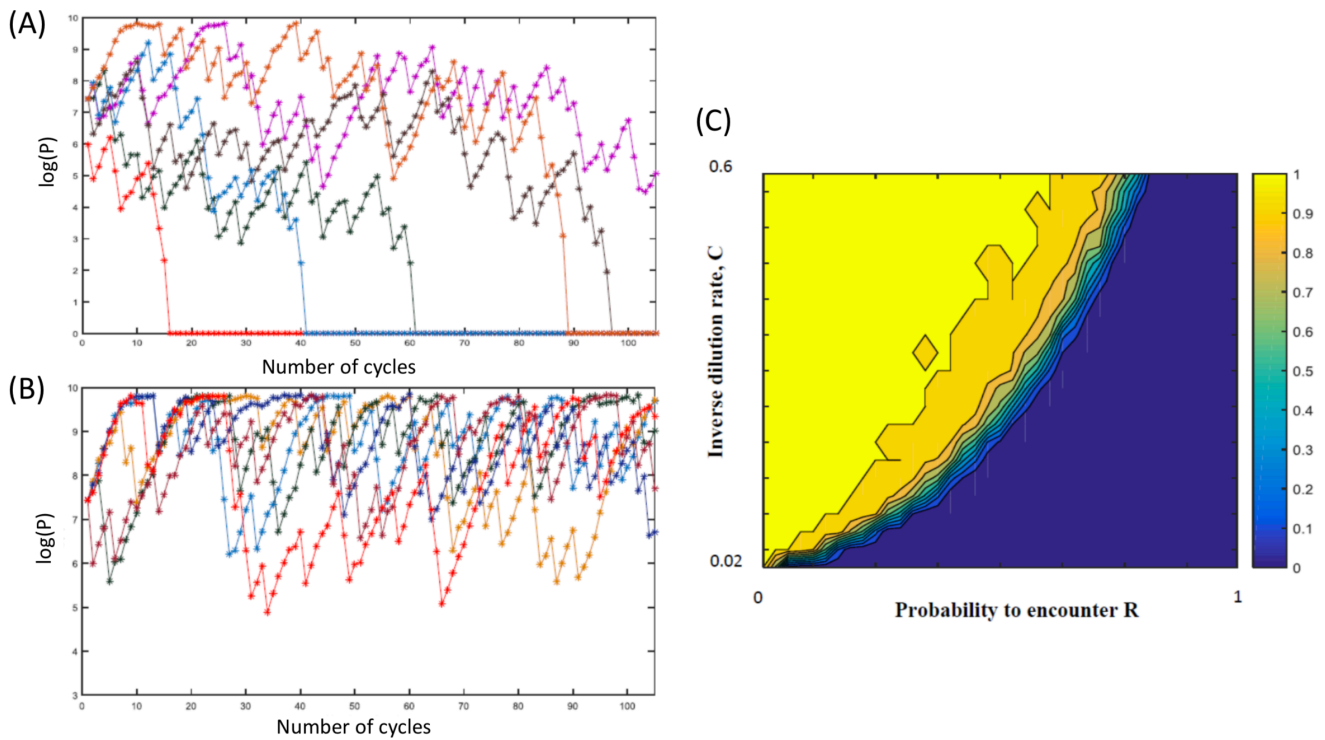

**Fig. 4. Illustration of bacteriophage survival in spatially-structured sub-populations of *lic2A* phase variants of *H. influenzae*.**

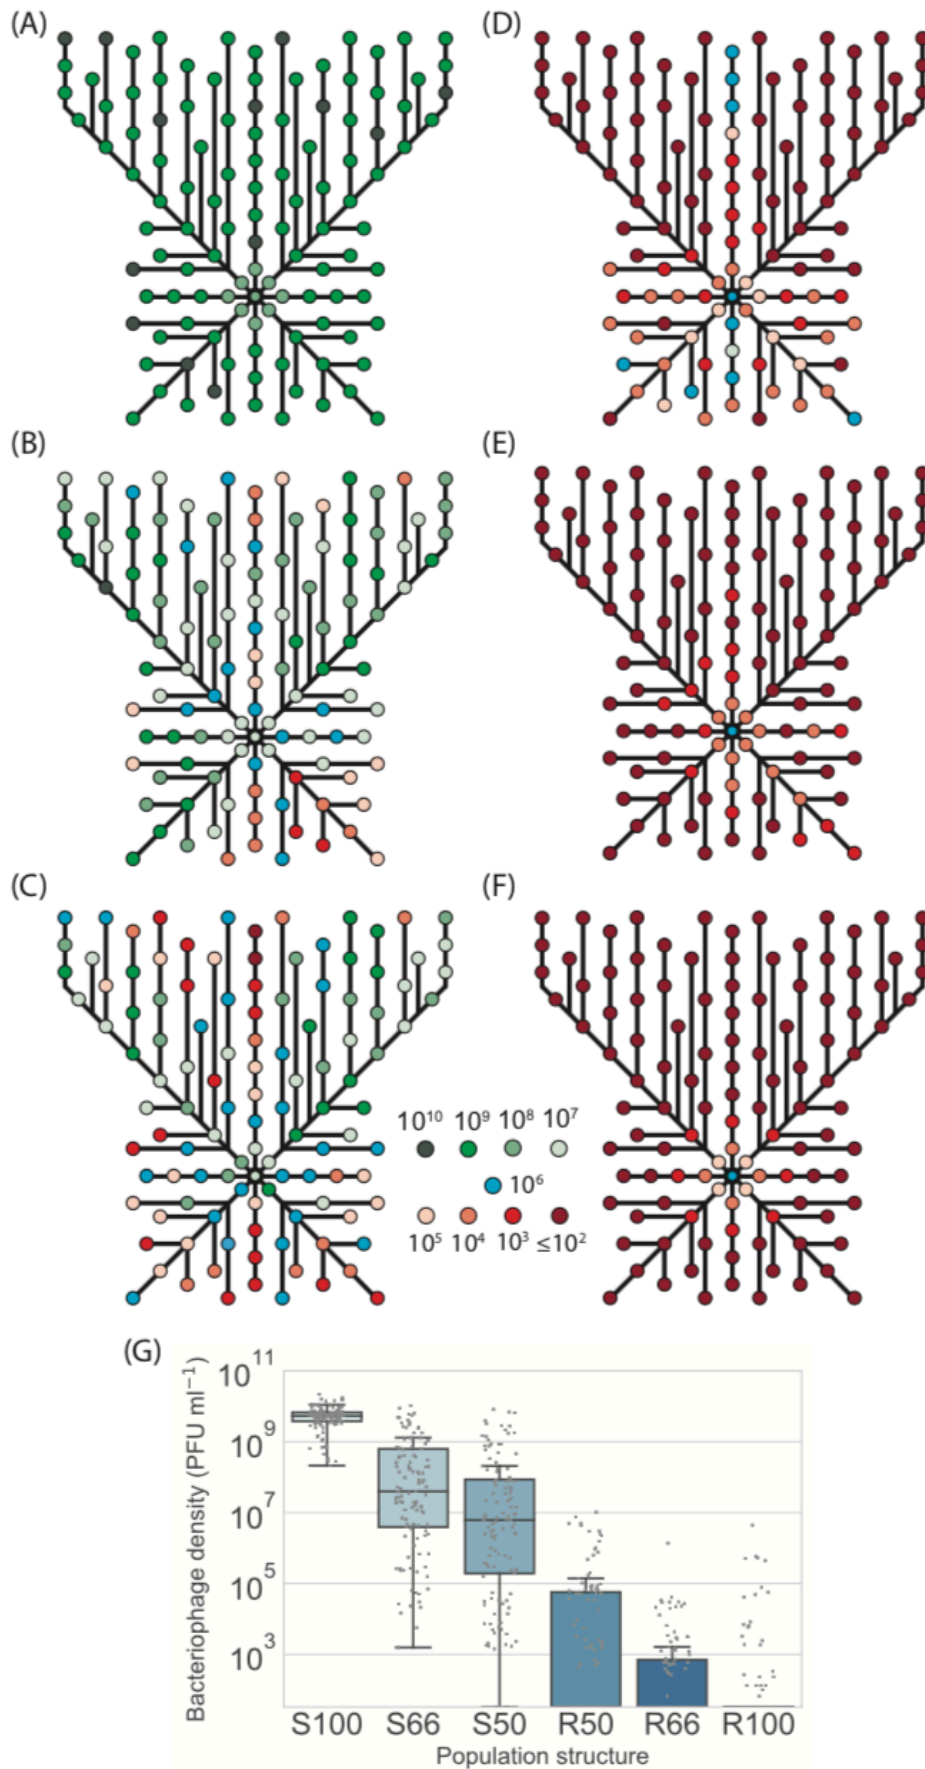

**Fig. 5 Model of the temporal fluctuations in the relative amounts of phage-sensitive and phage-resistant phase variants for a range of PV rates and selection pressures.**

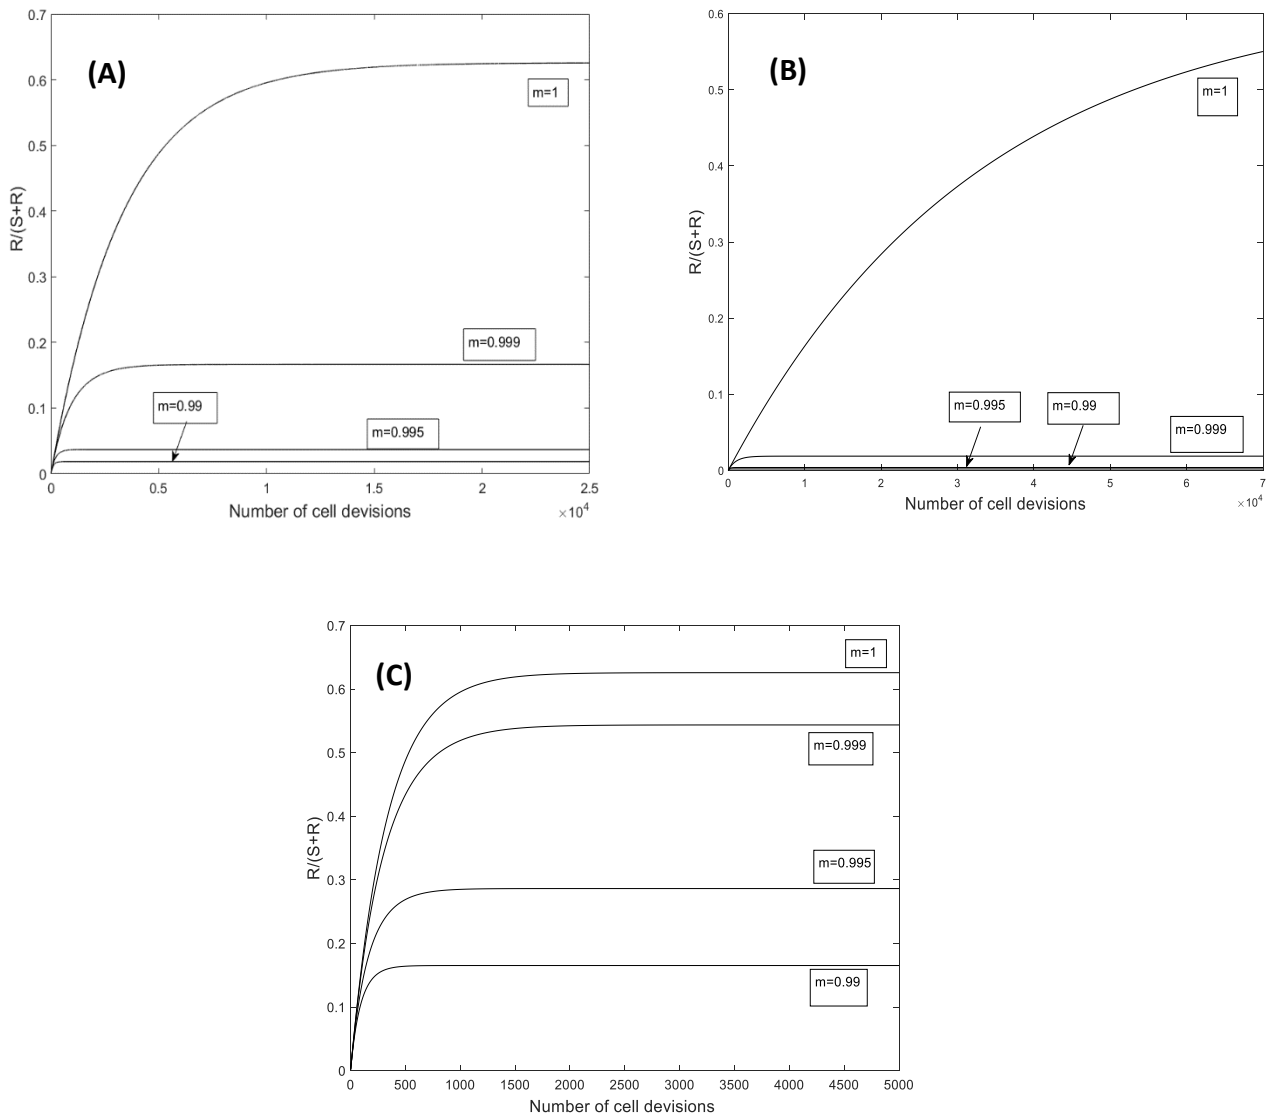

### Fig 6. Phase variation of phage resistance genes generates 'bacterial herd-immunity' in bacterial meta-populations

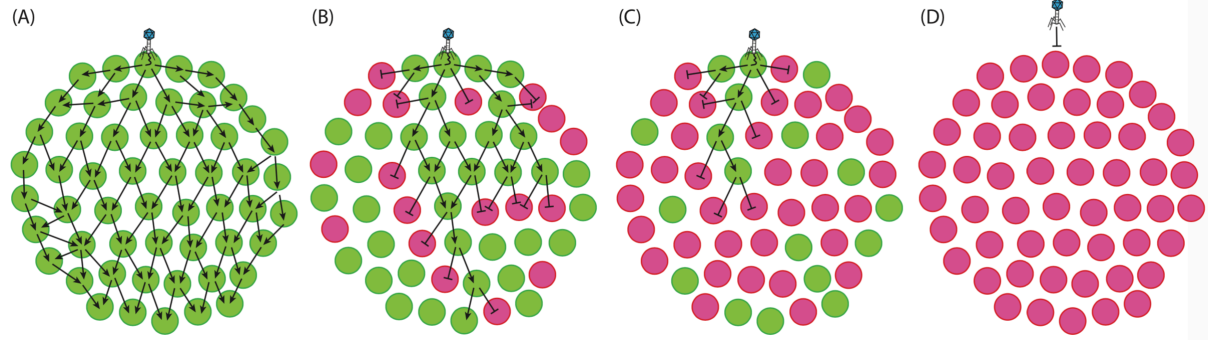

Source: https://www.biorxiv.org/content/10.1101/244814v2.full.pdf
